# Supplementary material for: Specific absorption in Y3Al5O12:Eu ceramics and the role of stable Eu2+ in energy transfer processes
Source: Royal Society of Chemistry journal article supplement (doi:10.1039/d0tc01957g), 2020-01-01
Supplement: d0tc01957g1.pdf [file d0tc01957g1.pdf]

Supplementary information for the paper entitled: „ **Extraordinary optical absorption in Y<sub>3</sub>Al<sub>5</sub>O<sub>12</sub>:Eu ceramics and the role of stable Eu<sup>2+</sup> in the energy transfer processes**“

<sup>1</sup>Maksym Buryi, <sup>1</sup>Lubomír Havlák, <sup>1</sup>Vítězslav Jarý, <sup>1,2</sup>Jan Bárta, <sup>1</sup>Valentin Laguta, <sup>1</sup>Alena Beitlerová, <sup>3,4</sup>Jiang Li, <sup>3,4</sup>Xiaopu Chen, <sup>3,5</sup>Yong Yuan, <sup>5</sup>Qiang Liu, <sup>6</sup>Yubai Pan, <sup>1</sup>Martin Nikl

<sup>1</sup>*Institute of Physics, Academy of Sciences of the Czech Republic, Na Slovance 1999/2, 182 21 Prague 8, Czech Republic*

<sup>2</sup>*Faculty of Nuclear Sciences and Physical Engineering, Czech Technical University in Prague, Břehová 7, 11519 Prague 1, Czech Republic*

<sup>3</sup>*Shanghai Institute of Ceramics, Chinese Academy of Sciences, 585 Heshuo Road, Shanghai 201899, P. R. China*

<sup>4</sup>*Center of Materials Science and Optoelectronics Engineering, University of Chinese Academy of Sciences, Beijing, 100049, China*

<sup>5</sup>*School of Material Science and Engineering, Jiangsu University, 301 Xuefu Road, Zhenjiang 212013, China*

<sup>6</sup>*Department of Physics, Shanghai Normal University, Shanghai 200234, China*

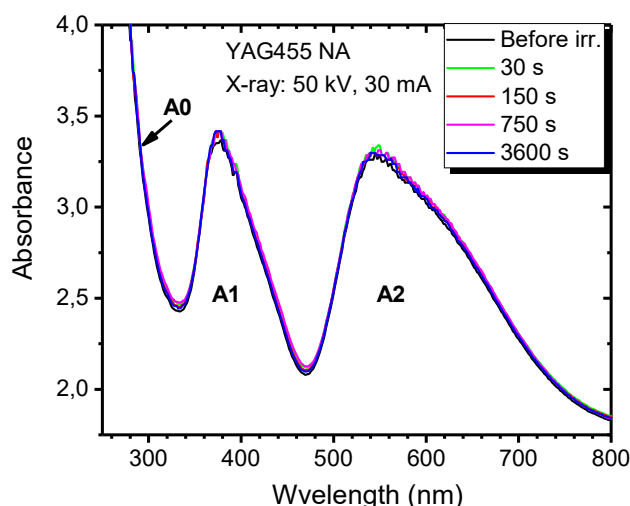

Fig. S1. RT absorption spectra of YAG455 NA treated under different irradiation conditions, see the text. The two bands, A1 and A2 are clearly visible, whereas the A0 one is strongly overlapped with the absorption edge.

Octahedral and tetrahedral Fe<sup>3+</sup> EPR spectra were simulated by using the following spin-Hamiltonians

$$\hat{H} = \beta_e g \mathbf{H} \hat{S} + \frac{D}{3} O_2^0 + B_4^0 O_4^0 + B_4^4 O_4^4 + B_4^{-4} O_4^{-4}, \text{ tetrahedral, } B_4^0 = \frac{a + \frac{2}{3}F}{120}, B_4^{\pm 4} = \pm \frac{a}{24} \cos(\sin) 4\beta, \quad (\text{S1})$$
$$\hat{H} = \beta_e g \mathbf{H} \hat{S} + \frac{D}{3} O_2^0 + B_4^0 O_4^0 + B_4^3 O_4^3 + B_4^{-3} O_4^{-3}, \text{ octahedral, } B_4^0 = \frac{F - a}{180}, B_4^{\pm 3} = \pm \frac{a\sqrt{2}}{9} \cos(\sin) 3\alpha,$$

the cosine function is used for “+” whereas the sine for “-”.

where  $\beta_e$  is the Bohr magneton,  $\hat{S}$  is an electron spin operator of the  $S = 5/2$  spin,  $D$ ,  $B_k^q$ , and  $O_k^q$  are zero field splitting (ZFS) parameters and Stevens operators, respectively [S1]. The ZFS parameters for

the spectra simulation (Fig. 13II in the main article text) were calculated from the  $a$  and  $F$  ZFS parameters and angles  $\alpha = 27.5^\circ$ ,  $\beta = 16^\circ$ , reported in [S2], corresponding to the rotation of the Al tetrahedron, and octahedron around [111], and [001] directions, respectively.

The following spin-Hamiltonian has been used for the  $\text{Cr}^{3+}$  EPR powder spectrum usual for YAG lattice [S3] and two a bit different (perturbed),  $\text{Cr}_1^{3+}$  and  $\text{Cr}_2^{3+}$ , EPR powder spectra simulation (the parameters are listed in Table 2 in the main article text).

$$\hat{H} = \beta_e g \mathbf{H} \hat{\mathbf{S}} + \frac{D}{3} O_2^0. \quad (\text{S2})$$

The following spin-Hamiltonian was used to simulate the  $\text{Gd}^{3+}$  powder EPR spectrum:

$$\hat{H} = \beta_e g \mathbf{H} \hat{\mathbf{S}} + b_2^0 O_2^0 + b_2^2 O_2^2 + b_4^0 O_4^0 + b_4^4 O_4^4 + b_6^0 O_6^0 + b_6^4 O_6^4, \quad (\text{S3})$$

$\hat{\mathbf{S}}$  is an electron spin operator with  $S = 7/2$  eigenvalue,  $b_k^q$  are the ZFS parameters directly proportional to the  $B_k^q$  in Eq. 1 [S1]. Spin-Hamiltonian parameters were taken from [S4].

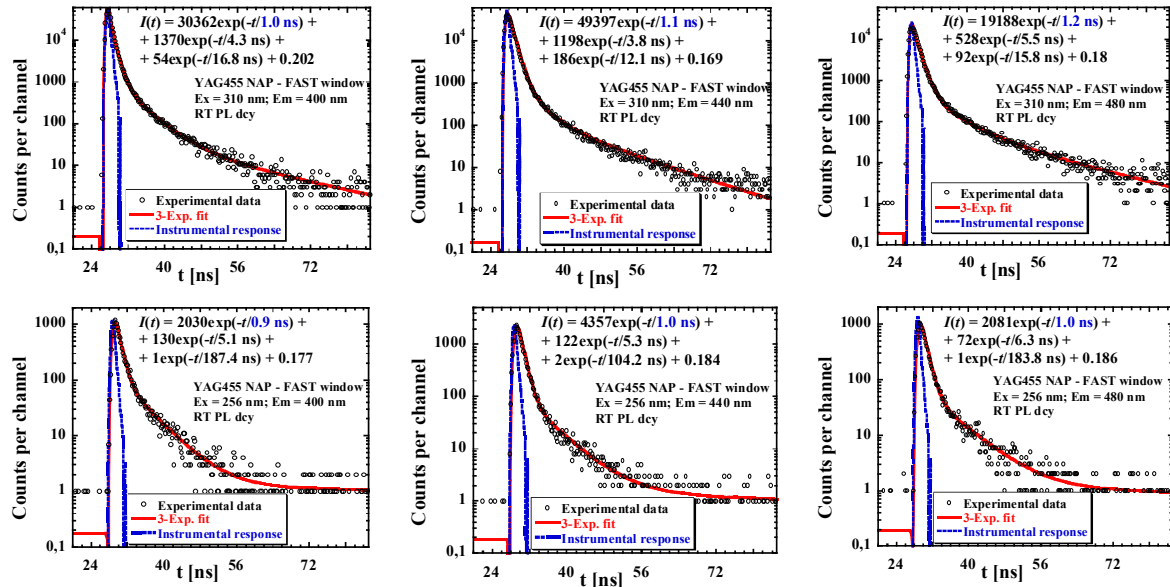

Fig. S2. Decay curves measured in the powdered YAG455 NA sample (YAG455 NAP) for three emission maxima: 400, 440 and 480 nm. Three upper graphs correspond to the 310 nm excitation wavelength whereas the lower three to the 256 nm.

## References

- [S1] S. A. Altshuler, B. M. Kozyrev, *Electron Paramagnetic Resonance in Compounds of Transition Elements*, 2nd ed.; John Wiley & Sons, Inc.: New York, NY, USA, 1974.
- [S2] L. Rimai, T. Kushida, *Phys. Rev. B*, 1966, **143**, 160-164.
- [S3] J. W. Carson, R. L. White, 1961, **32**, 1787.
- [S4] L. Rimai, G. A. deMars, *Journal of Applied Physics*, 1962, **33**, 1254.
